# Supplementary material
Source: Springer Nature journal article supplement (https://www.springermedizin.de/resource/supplementary/12885_2014_4937_MOESM2_ESM.pdf/9467792)

**A**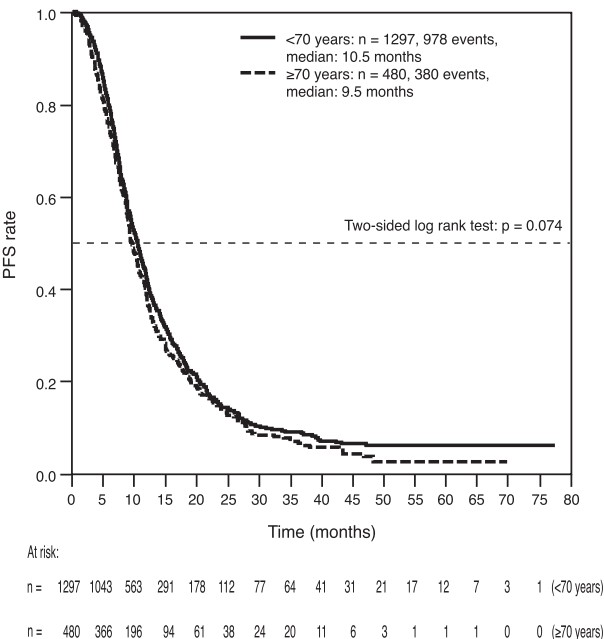**B**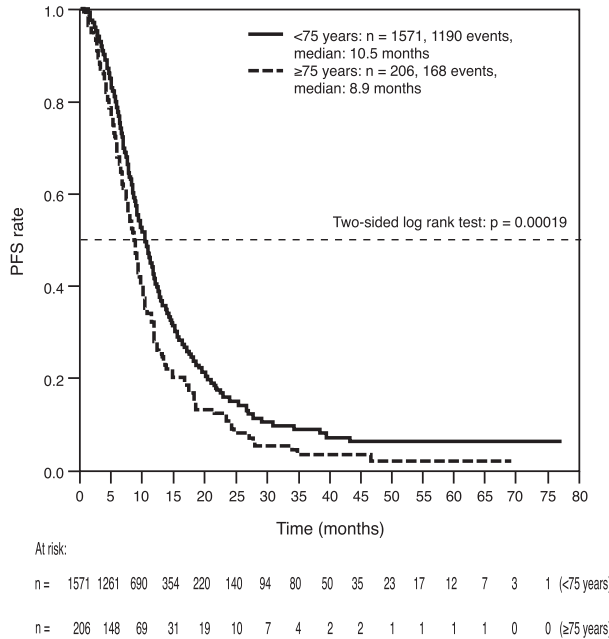**C**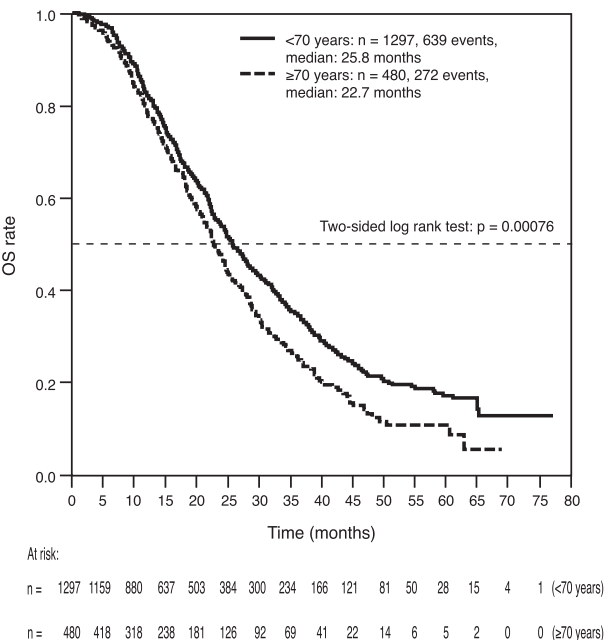**D**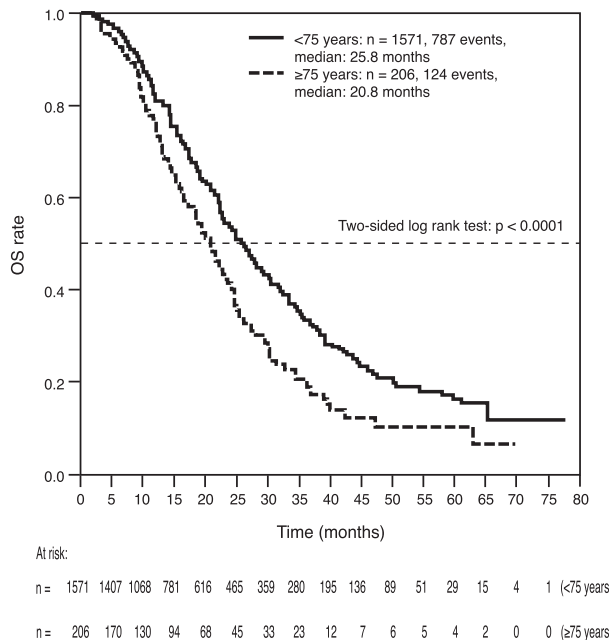

Supplement: MOESM2 [file 9467792]
